# Supplementary material for: Lignin-Derivative Ionic Liquids as Corrosion Inhibitors
Source: MDPI journal article supplement (doi:10.3390/molecules28145568), 2023-07-21
Supplement: s1 [file s1]

Supplementary

# Lignin-Derivative Ionic Liquids as Corrosion Inhibitors

Sharon Monaci <sup>1,2</sup>, Daniela Minudri <sup>1</sup>, Lorenzo Guazzelli <sup>3</sup>, Andrea Mezzetta <sup>3</sup>, David Mecerreyes <sup>1,4</sup>, Maria Forsyth <sup>1,2,4</sup> and Anthony Somers <sup>2,\*</sup>

<sup>1</sup> POLYMAT, University of the Basque Country UPV/EHU, 20018 Donostia-San Sebastian, Spain; smonaci@deakin.edu.au (S.M.); daniela.minudri@polymat.eu (D.M.); david.mecerreyes@ehu.es (D.M.); maria.forsyth@deakin.edu.au (M.F.)

<sup>2</sup> Institute for Frontier Materials, Deakin University, Burwood, VIC 3125, Australia

<sup>3</sup> Dipartimento di Farmacia, Università di Pisa, Via Bonanno Pisano 33, 56126 Pisa, Italy; lorenzo.guazzelli@unipi.it (L.G.); andrea.mezzetta@unipi.it (A.M.)

<sup>4</sup> Ikerbasque, Basque Foundation for Science, 48009 Bilbao, Spain

\* Correspondence: anthony.somers@deakin.edu.au

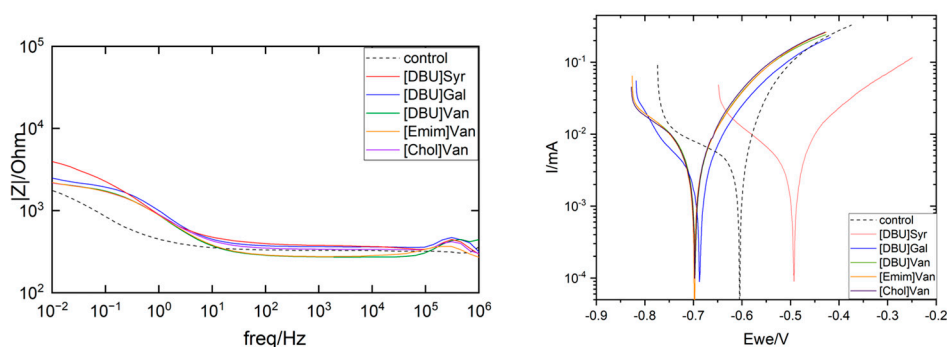

**Figure S1** Bode plot (left) and Cyclic Potentiodynamic Polarization (right) results of AS1020 mild steel after 24h at OCV in control (0.01M NaCl; dotted line) and inhibited solutions (0.01M NaCl + 5 mM inhibitor).

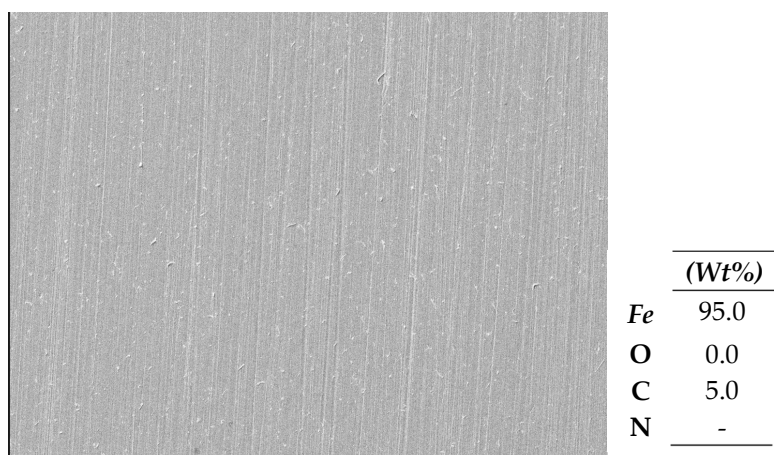

**Figure S2** EDS data of pristine mild steel.

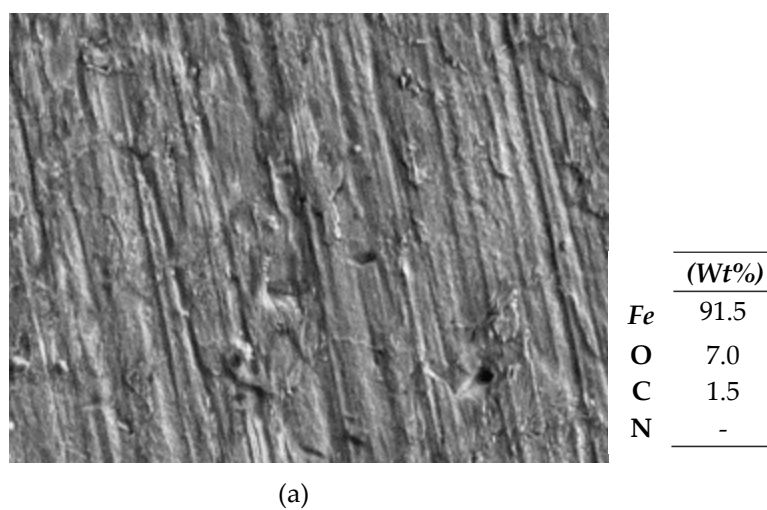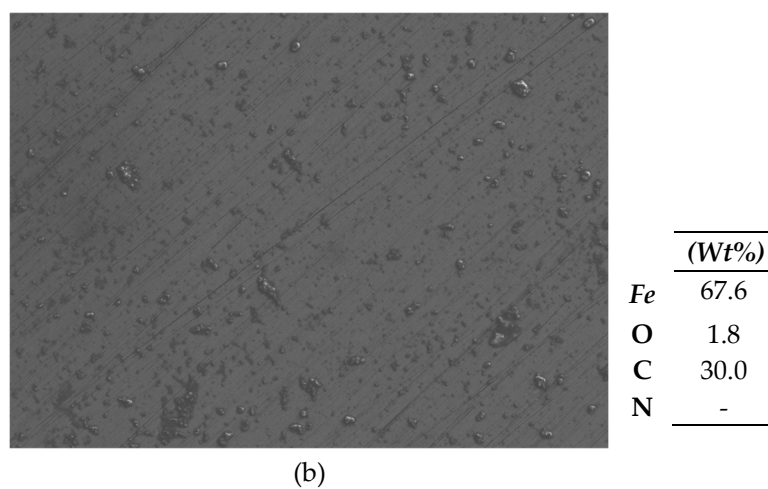

**Figure S3** EDS data of mild steel immersed in 0.01M NaCl + [Emim]Gal 10 mM (a); 0.01M NaCl + [Emim]Syr 10 mM (b) after 24h.

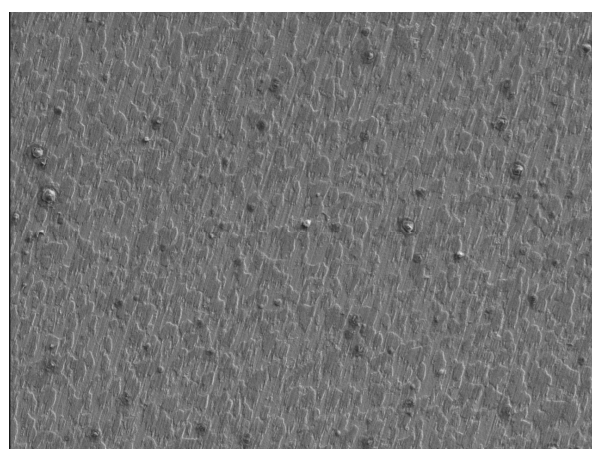

|    | (Wt%) |
|----|-------|
| Fe | 91.4  |
| O  | 3.1   |
| C  | 5.0   |
| N  | 0.5   |

(a)

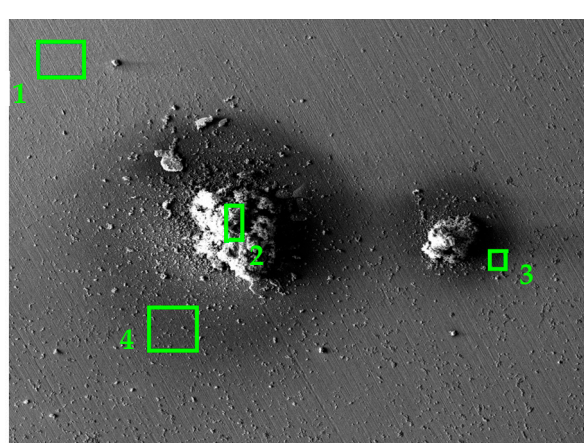

|    | 1     | 2    | 3    | 4    |
|----|-------|------|------|------|
|    | (Wt%) |      |      |      |
| Fe | 91.8  | 34.2 | 25.0 | 83.1 |
| O  | 1.0   | 24.3 | 25.6 | 8.3  |
| C  | 6.5   | 36.0 | 45.1 | 8.1  |
| N  | 0.7   | 5.3  | 4.2  | 0.4  |

(b)

**Figure S4** EDS data of 3 different zones (1,4: mild steel surface; 2,3: inhibitor deposits) of mild steel immersed in 0.01M NaCl + [Chol]Gal 10 mM (b); 0.01M NaCl + [Chol]Syr 10 mM (b) after 24h.

**Table S1.** Average area roughness of mild steel samples immersed in the inhibited solutions containing 0.01M NaCl and the inhibitor 10 mM, compared to pristine control immersed in 0.01M NaCl.

|                  | Sa<br>( $\mu\text{m}$ ) | $\sigma$ |
|------------------|-------------------------|----------|
| Pristine control | 0.101                   | 0.005    |
| [Emim]Gal        | 0.27                    | 0.04     |
| [Emim]Syr        | 0.24                    | 0.03     |
| [Chol]Gal        | 0.161                   | 0.004    |
| [Chol]Syr        | 0.109                   | 0.007    |

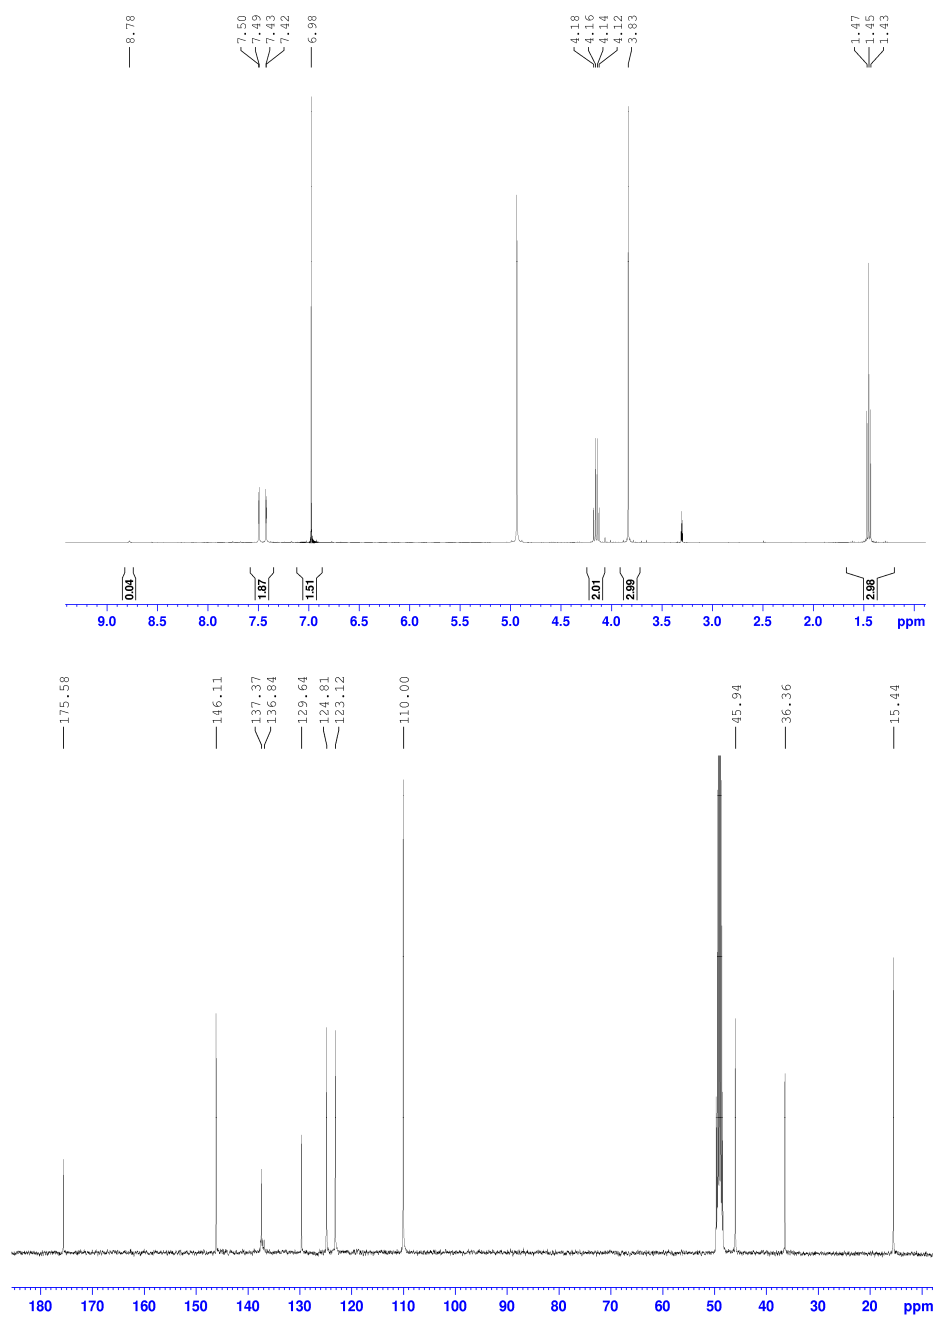**Figure S5**  $^1\text{H}$  NMR and  $^{13}\text{C}$  NMR spectra of [Emim]Gal

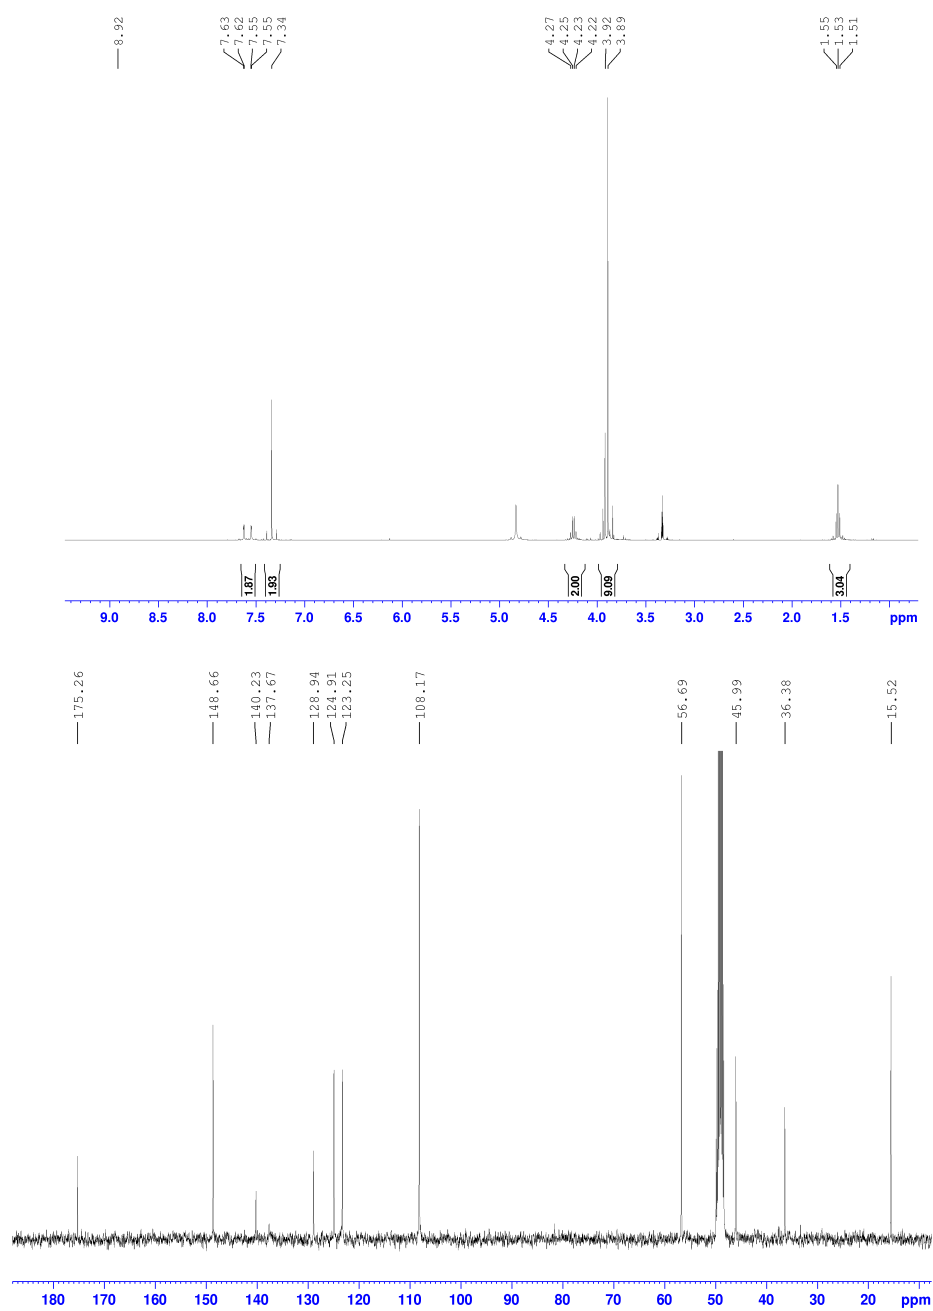

**Figure S6**  $^1\text{H}$  NMR and  $^{13}\text{C}$  NMR spectra of [Emim]Syr

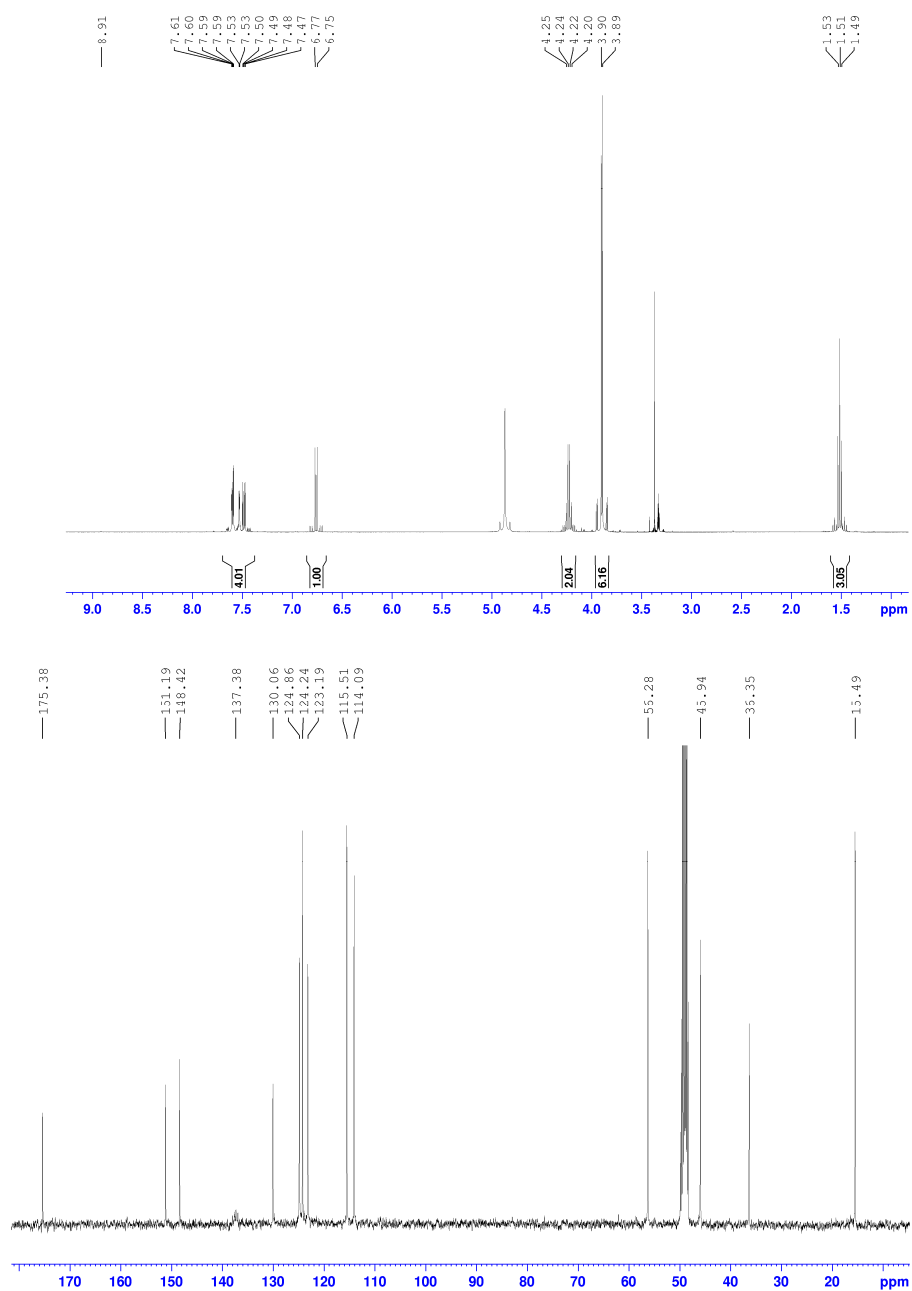

**Figure S7**  $^1\text{H}$  NMR and  $^{13}\text{C}$  NMR spectra of [Emim]Van

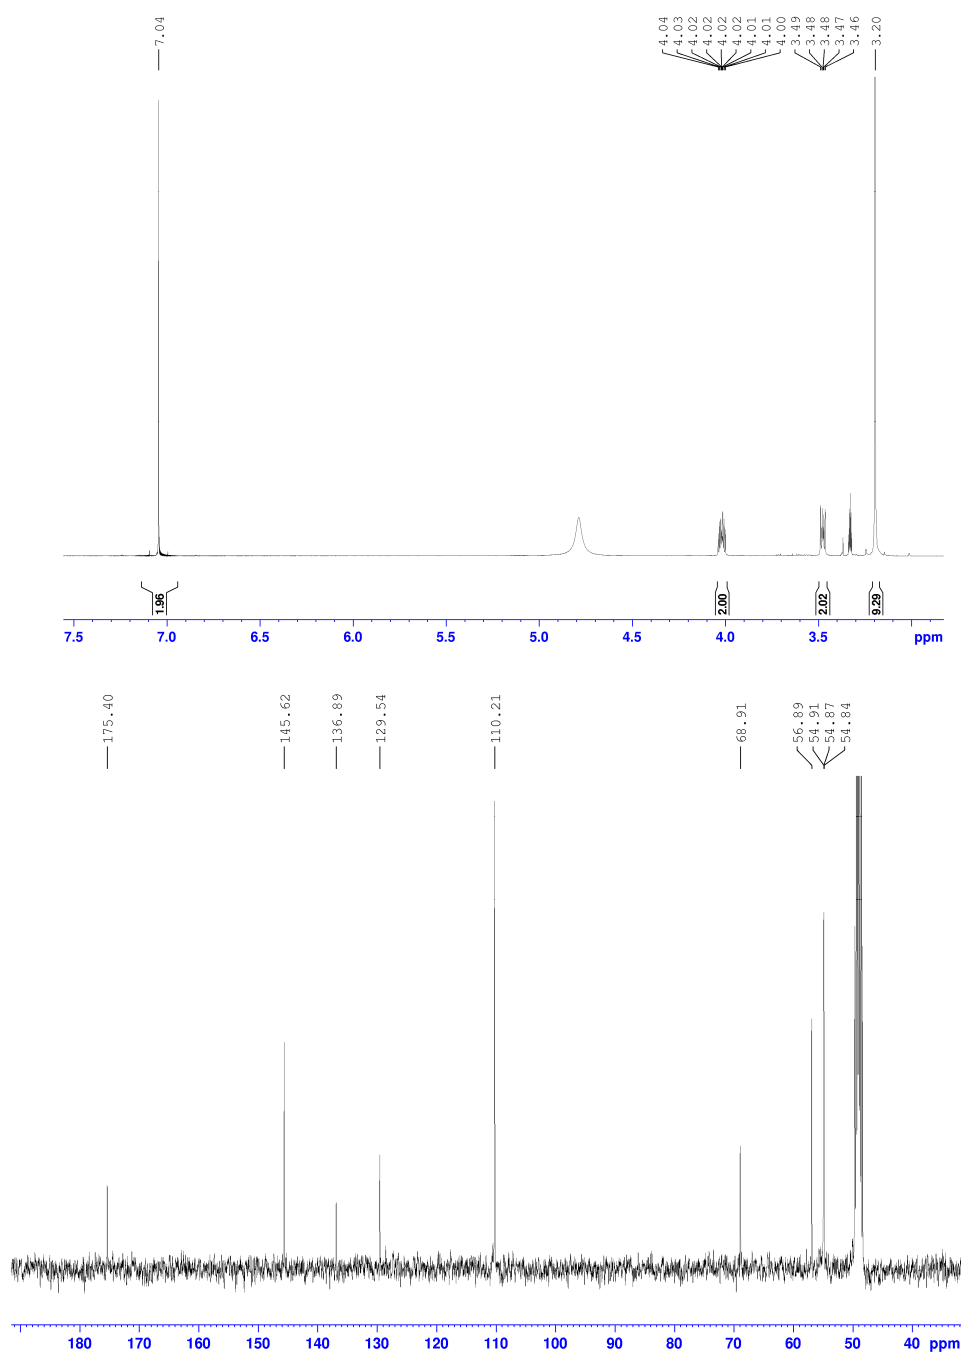

**Figure S8**  $^1\text{H}$  NMR and  $^{13}\text{C}$  NMR spectra of [Chol]Gal



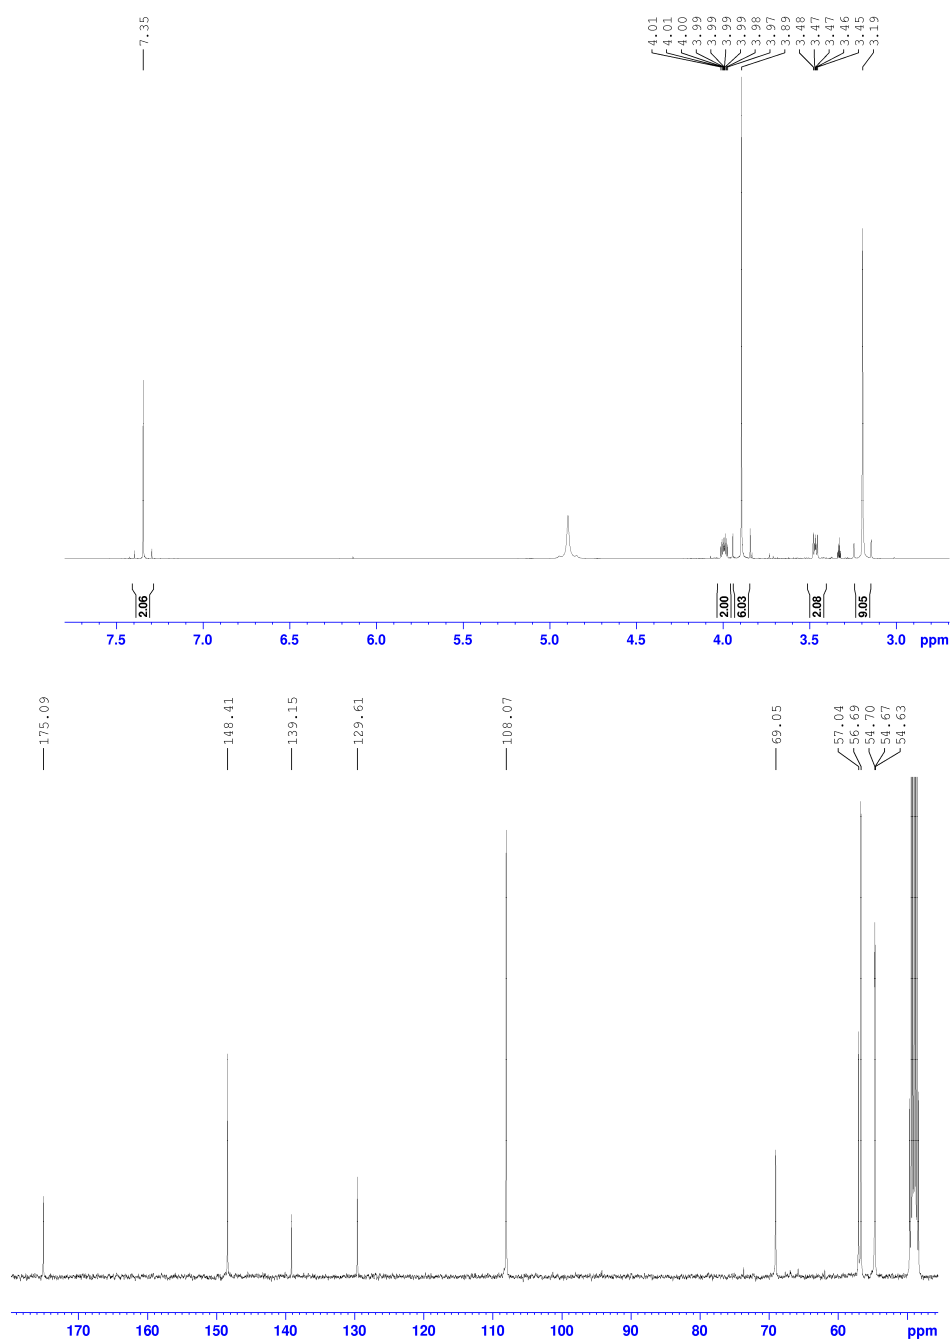

**Figure S9**  $^1\text{H}$  NMR and  $^{13}\text{C}$  NMR spectra of [Chol]Syr

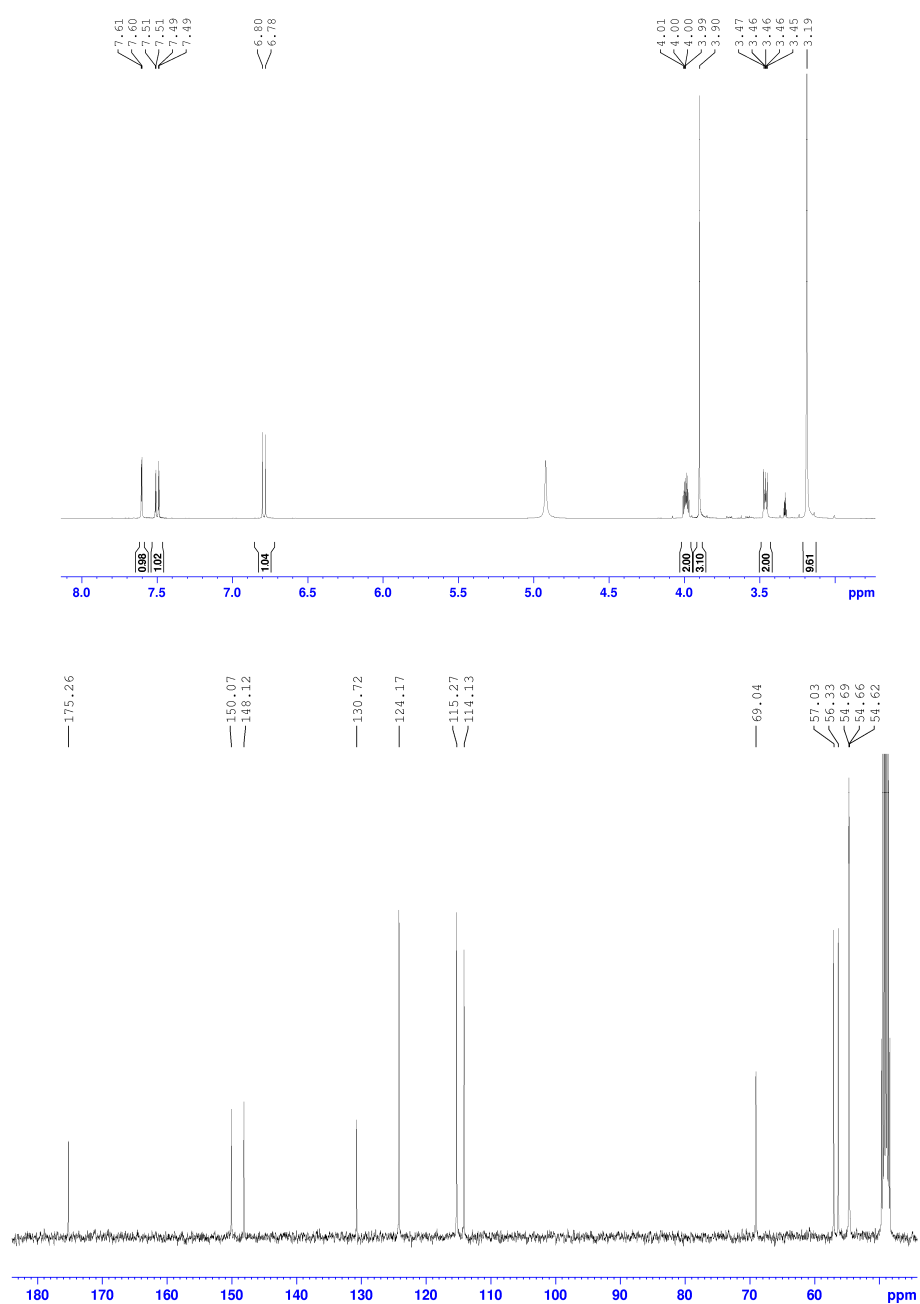

**Figure S10**  $^1\text{H}$  NMR and  $^{13}\text{C}$  NMR spectra of [Chol]Van

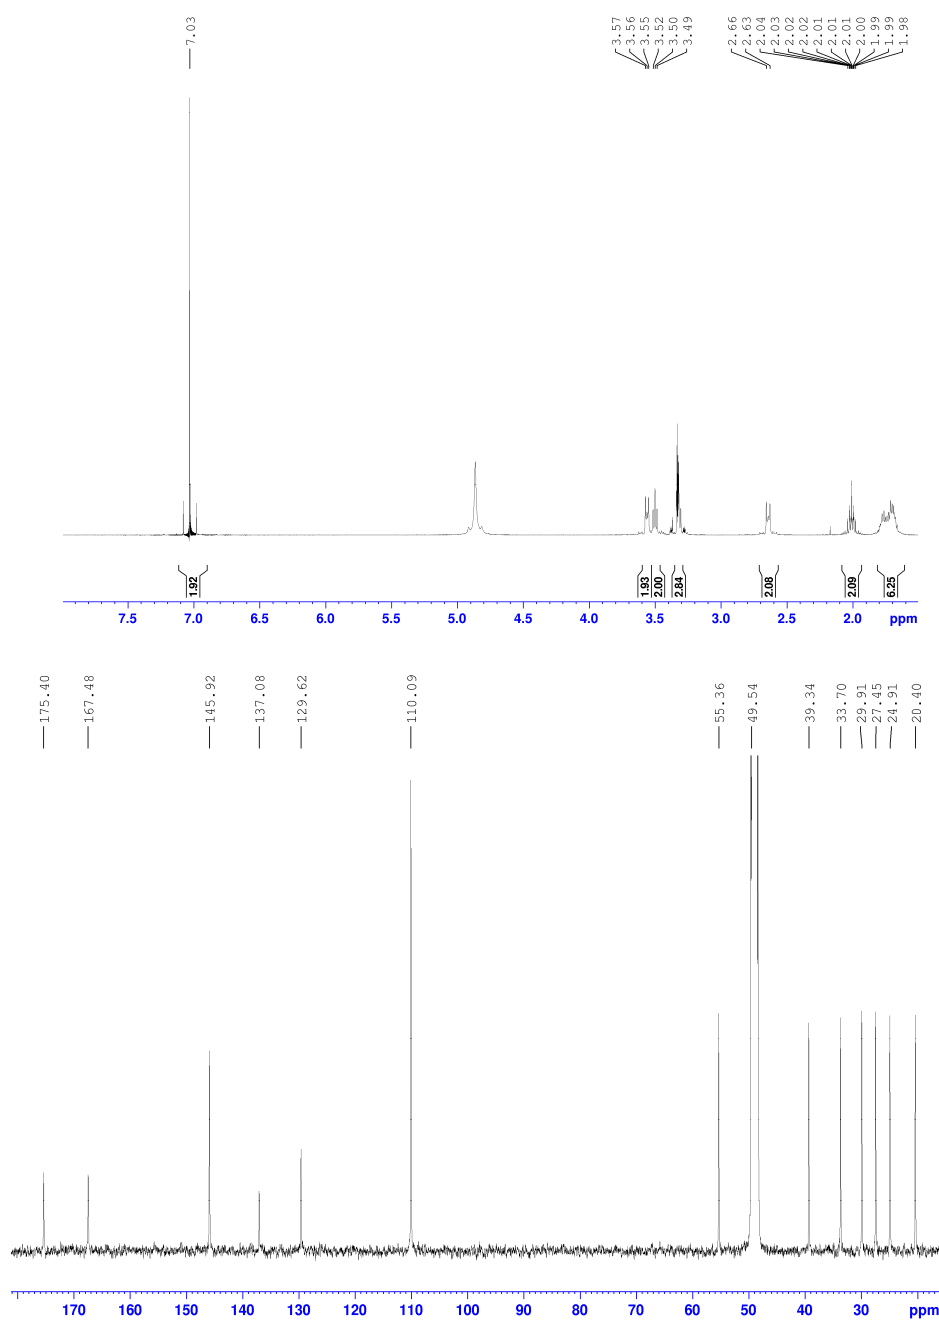

**Figure S11**  $^1\text{H}$  NMR and  $^{13}\text{C}$  NMR spectra of [DBU]Gal

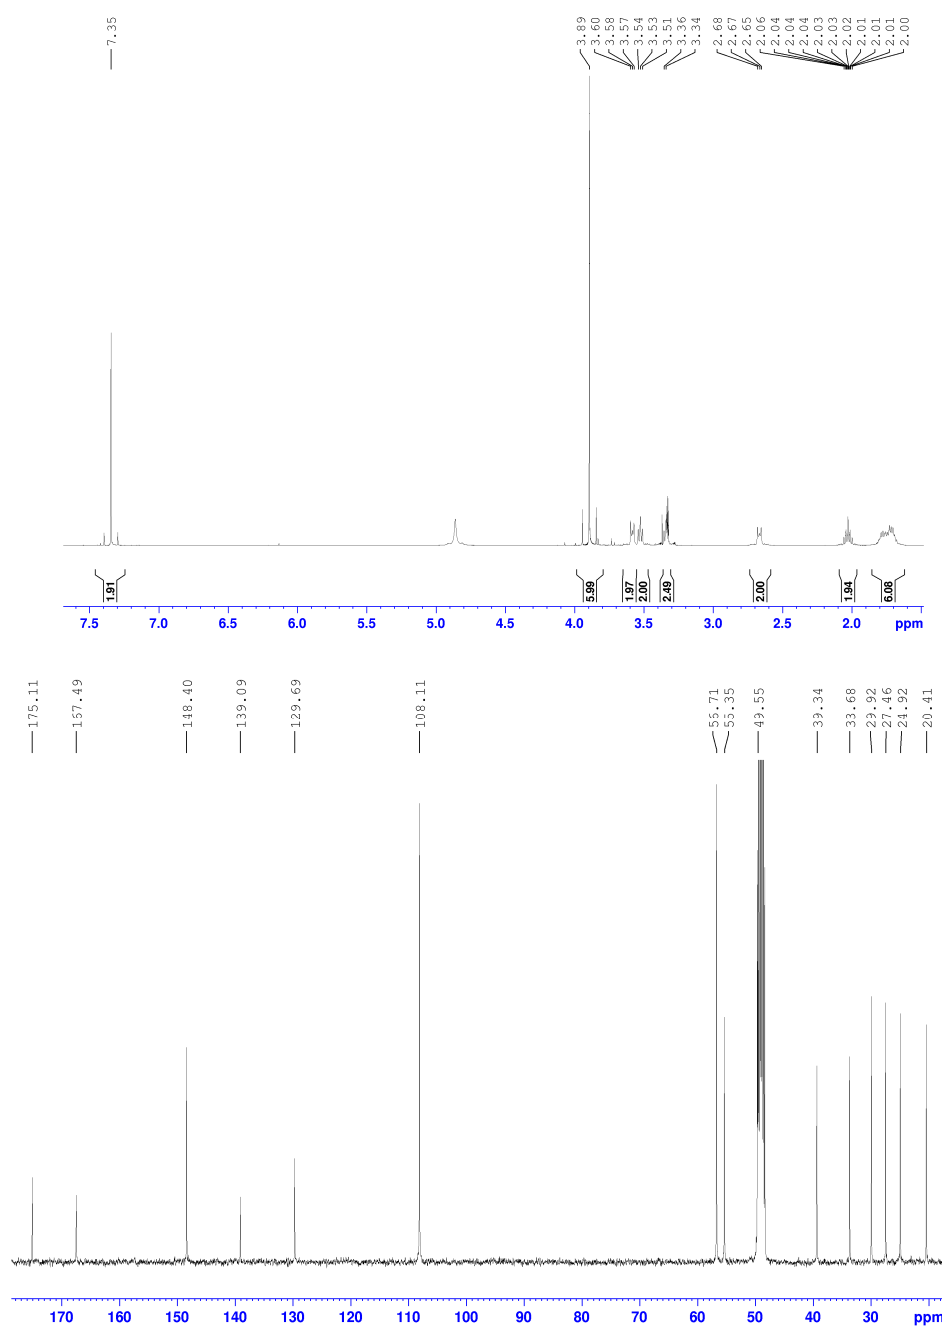

**Figure S12**  $^1\text{H}$  NMR and  $^{13}\text{C}$  NMR spectra of [DBU]Syr

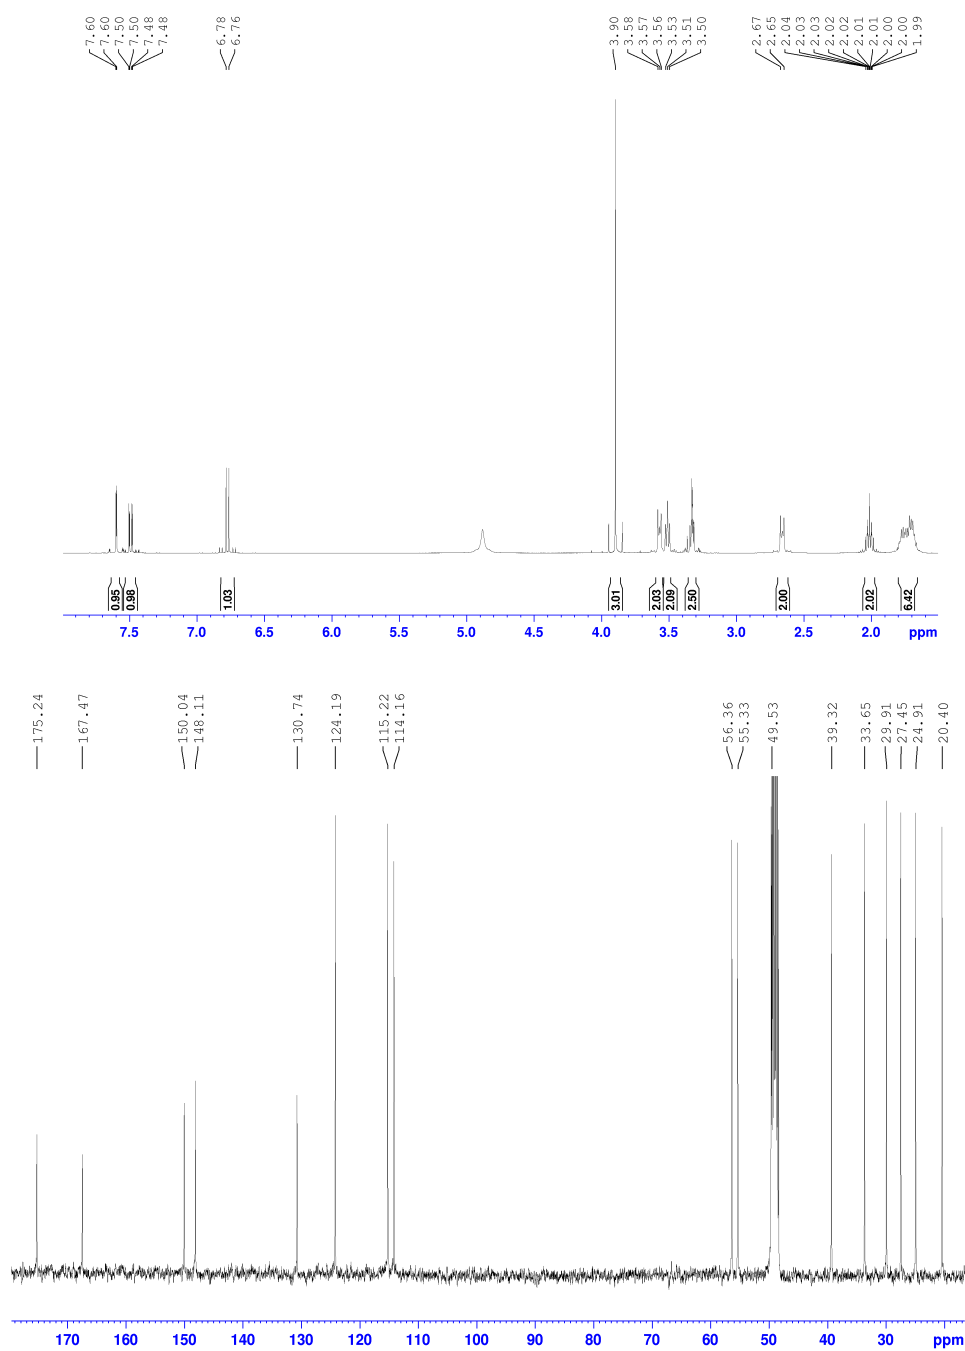**Figure S13**  $^1\text{H}$  NMR and  $^{13}\text{C}$  NMR spectra of [DBU]Van

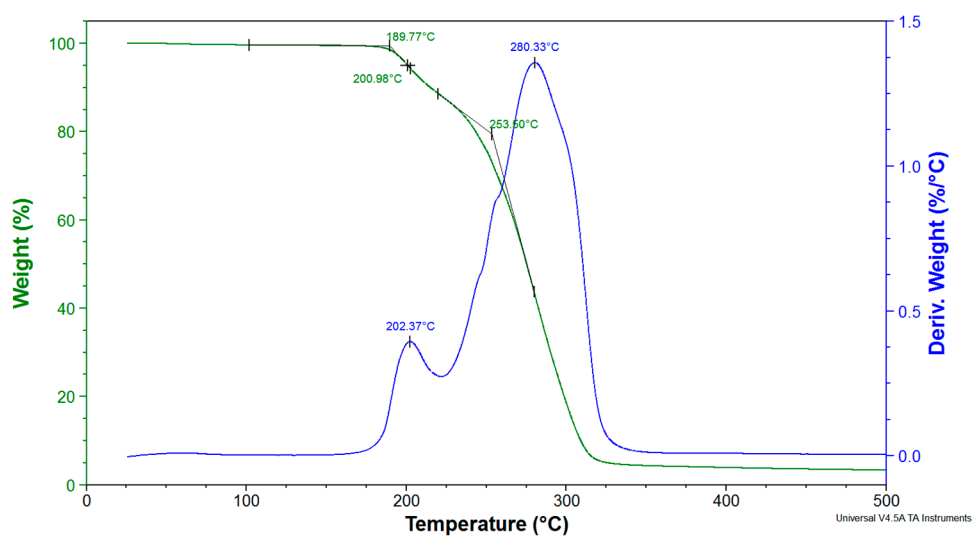

Figure S14 Thermogravimetric and derivative curves of [Emim]Gal

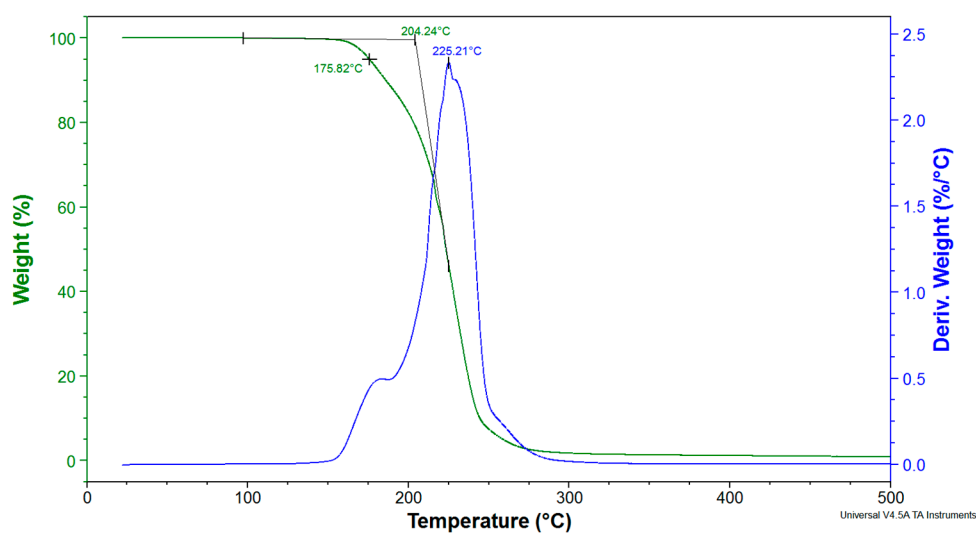

Figure S15 Thermogravimetric and derivative curves of [Emim]Syr

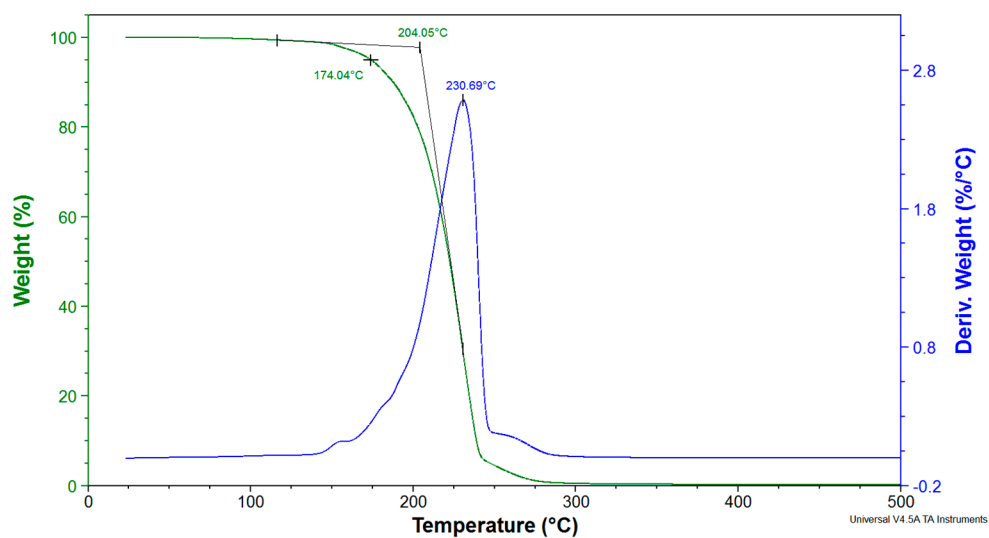

Figure S16 Thermogravimetric and derivative curves of [Emim]Van

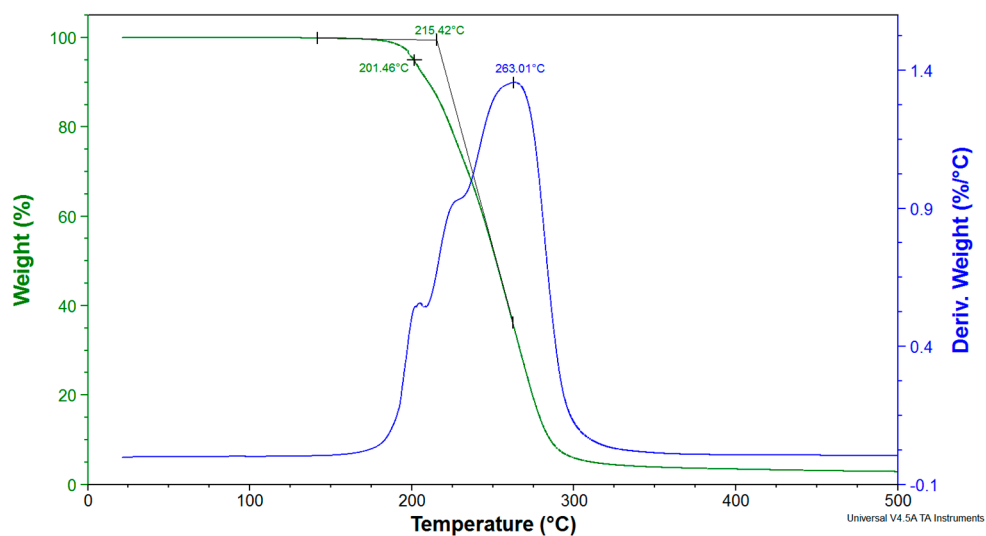

Figure S17 Thermogravimetric and derivative curves of [Chol]Gal

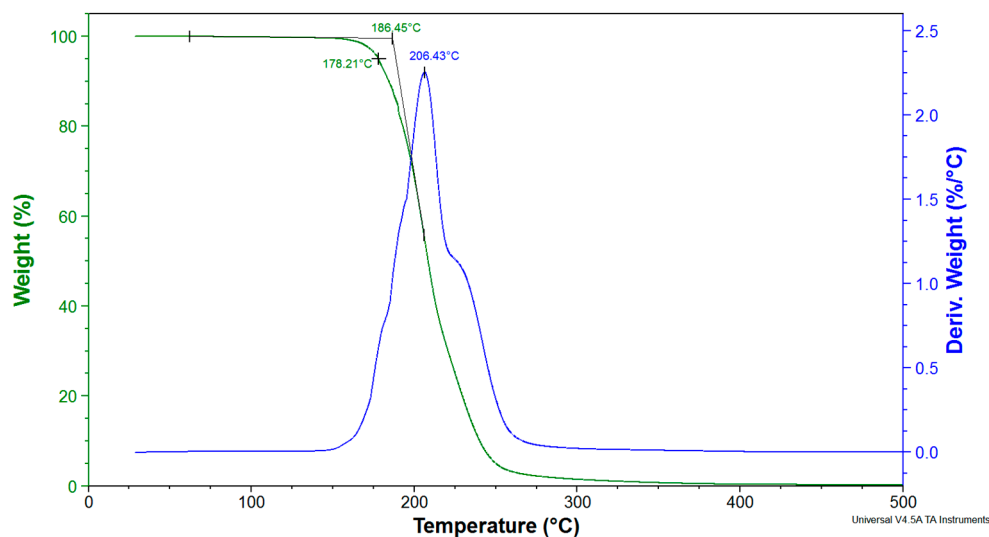

Figure S18 Thermogravimetric and derivative curves of [Chol]Syr

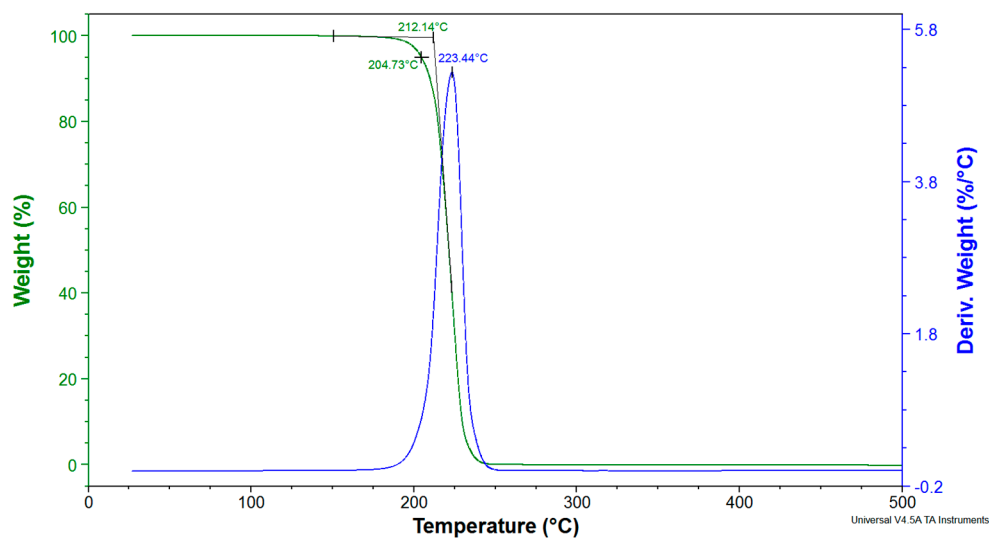

Figure S19 Thermogravimetric and derivative curves of [Chol]Van

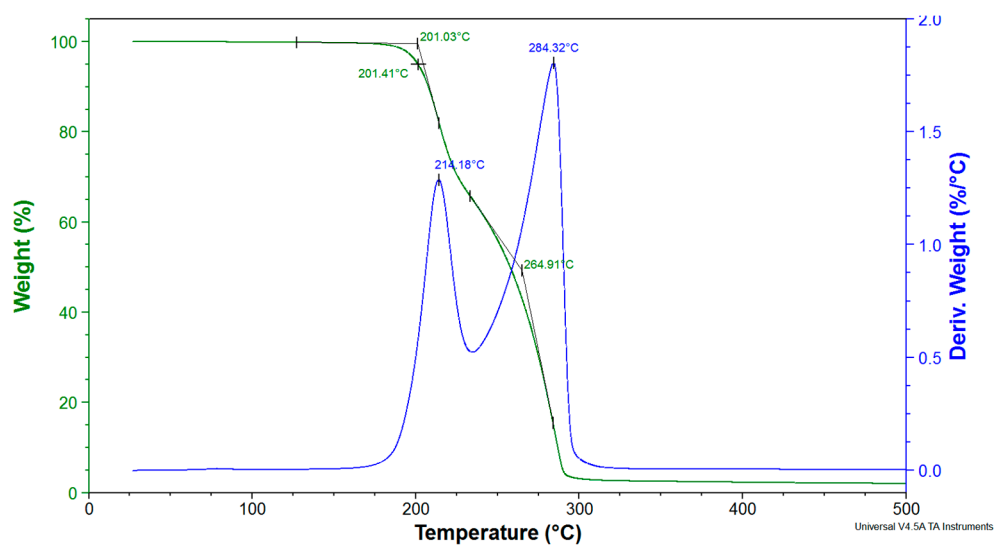

Figure S20 Thermogravimetric and derivative curves of [DBU]Gal

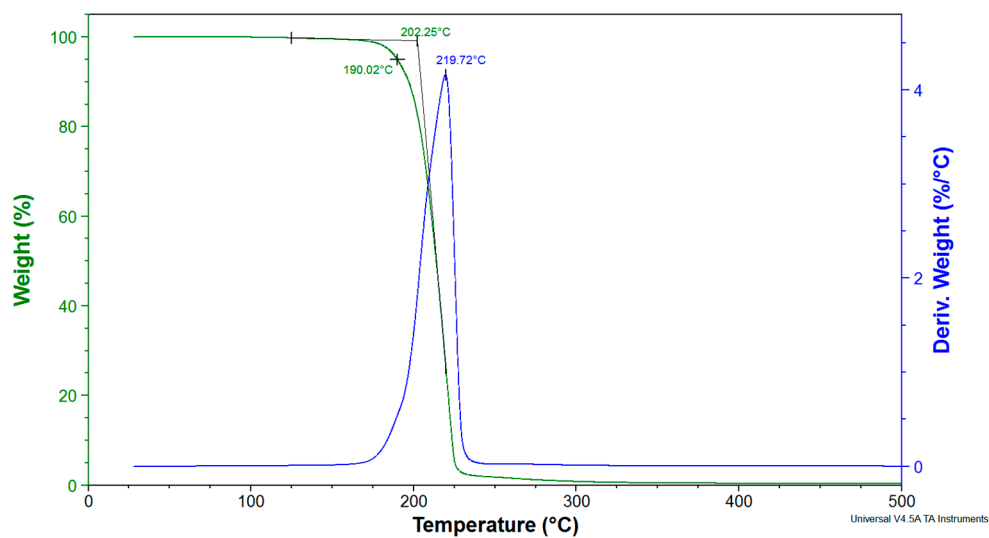

Figure S21 Thermogravimetric and derivative curves of [DBU]Syr



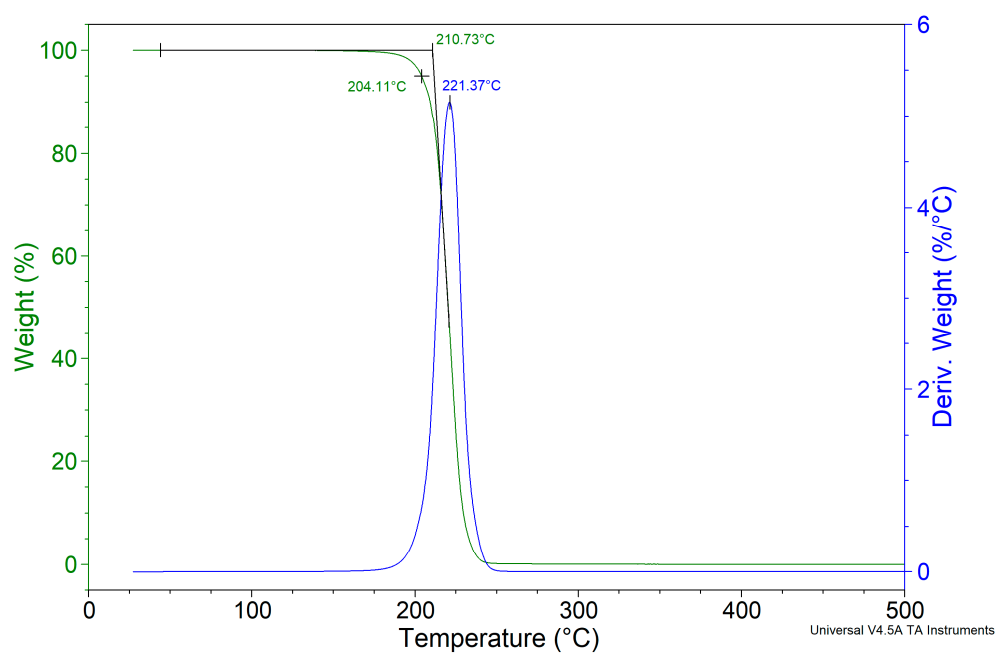

**Figure S22** Thermogravimetric and derivative curves of [DBU]Van

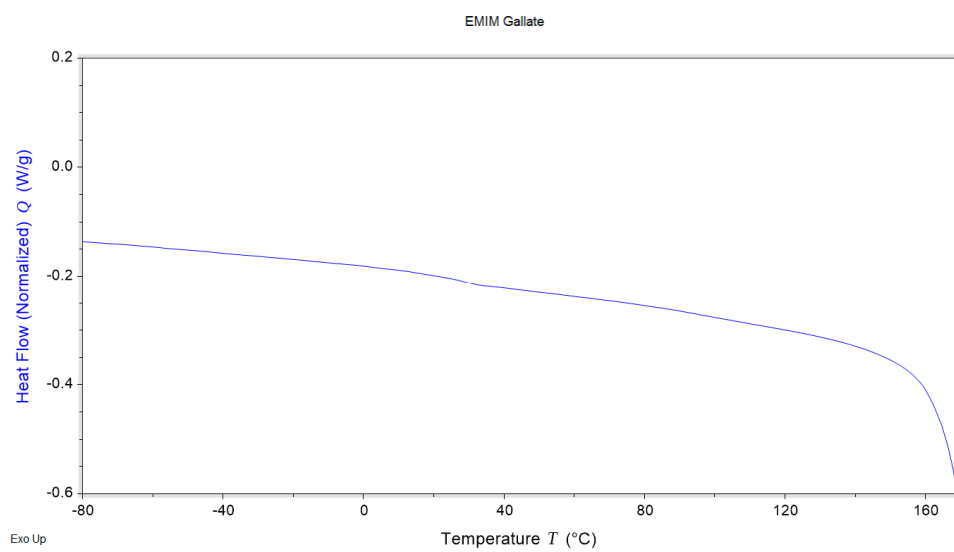

**Figure S23** DSC curve of [Emim]Gal

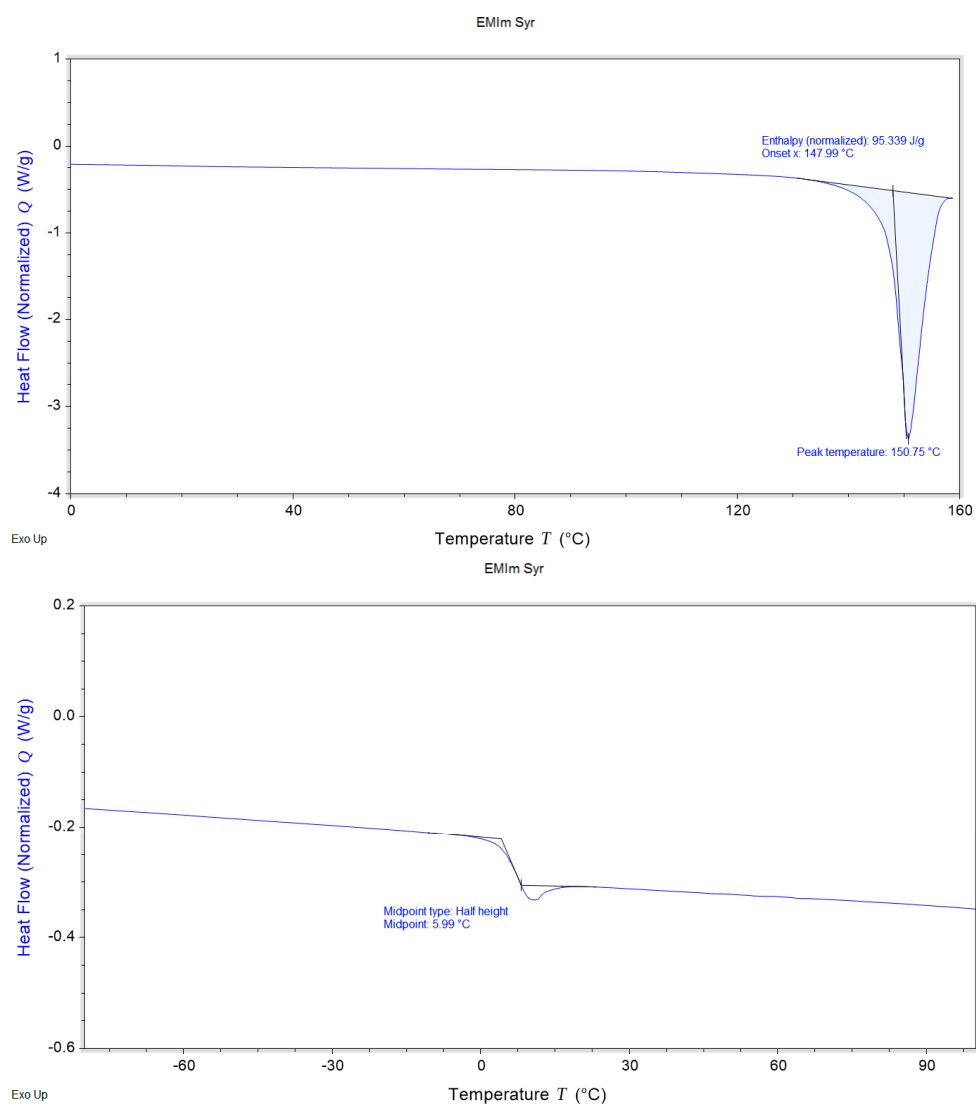**Figure S24** DSC curves of 1<sup>st</sup> and 2<sup>nd</sup> heating run of [Emim]Syr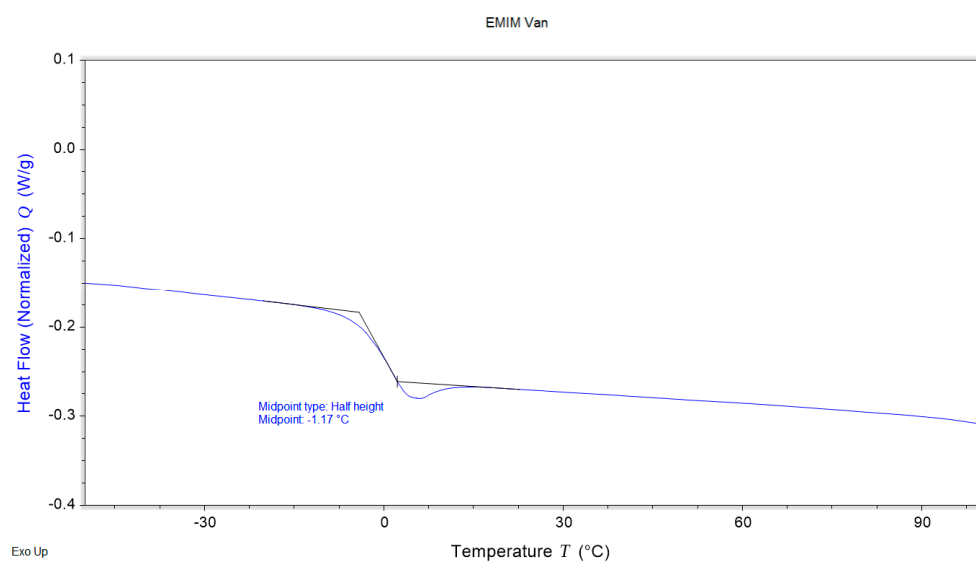**Figure S25** DSC curve of [Emim]Van

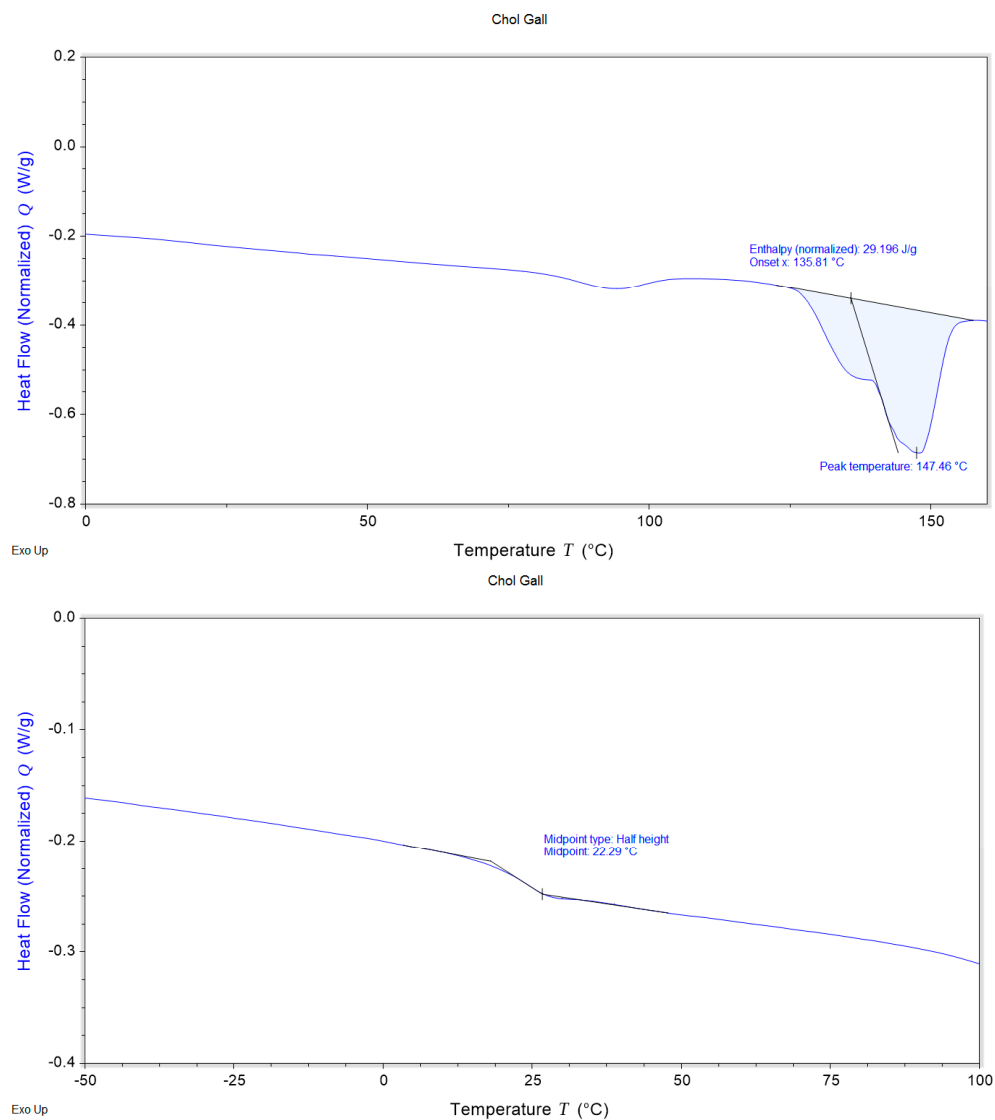**Figure S26** DSC curves of 1<sup>st</sup> and 2<sup>nd</sup> heating run of [Chol]Gal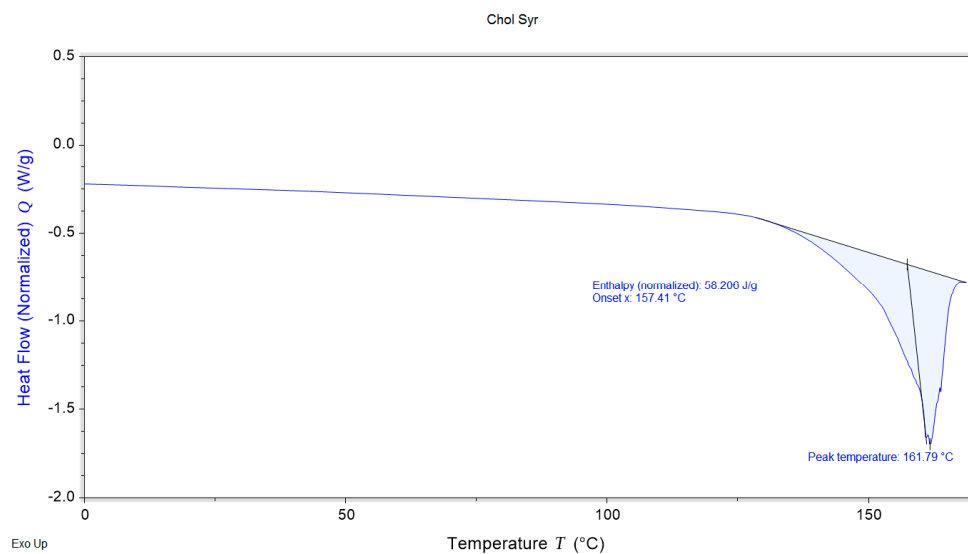

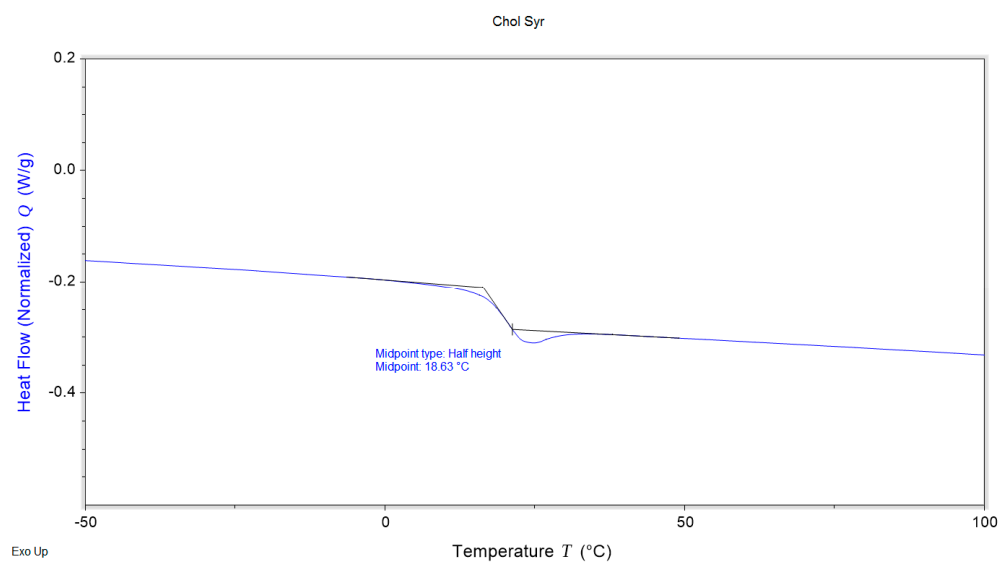**Figure S27** DSC curves of 1<sup>st</sup> and 2<sup>nd</sup> heating run of [Chol]Syr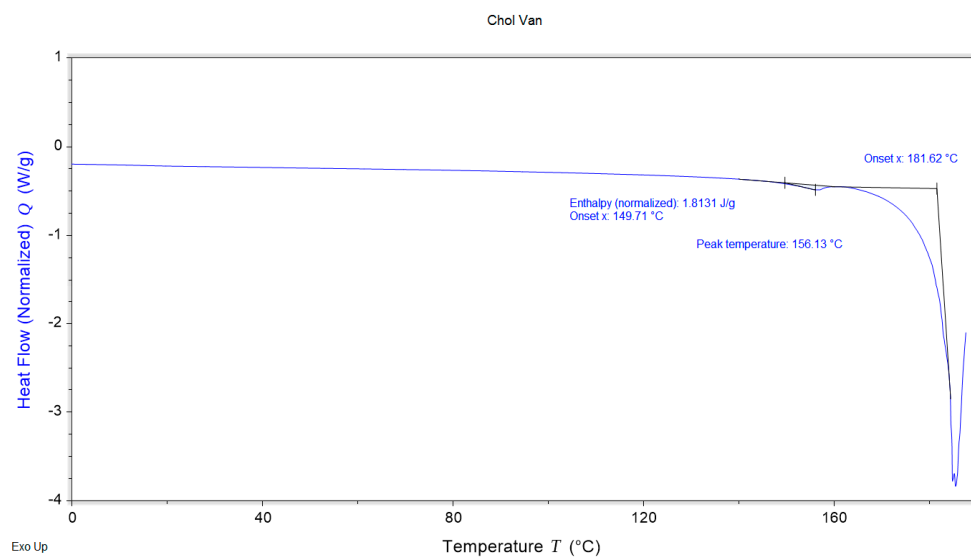**Figure S28** DSC curve of [Chol]Van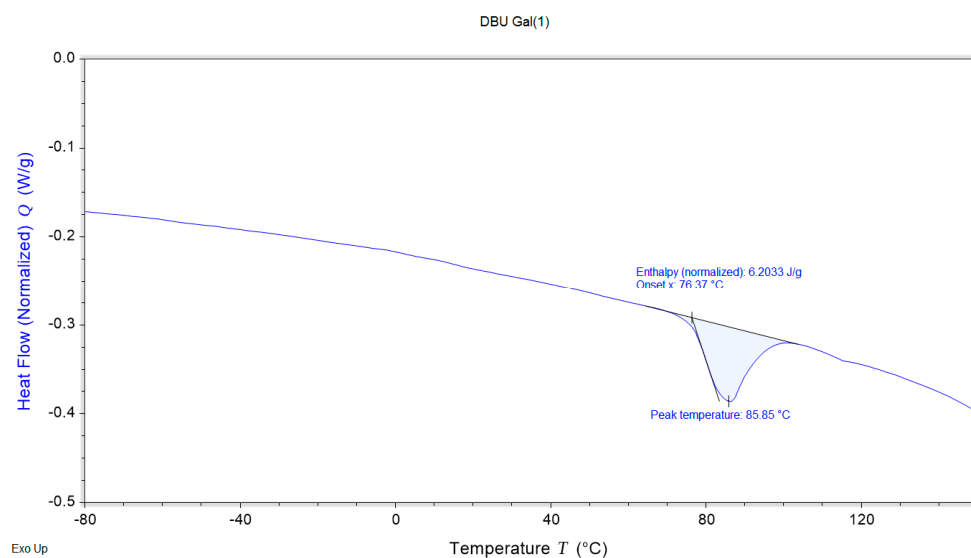**Figure S29** DSC curves of [DBU]Gal

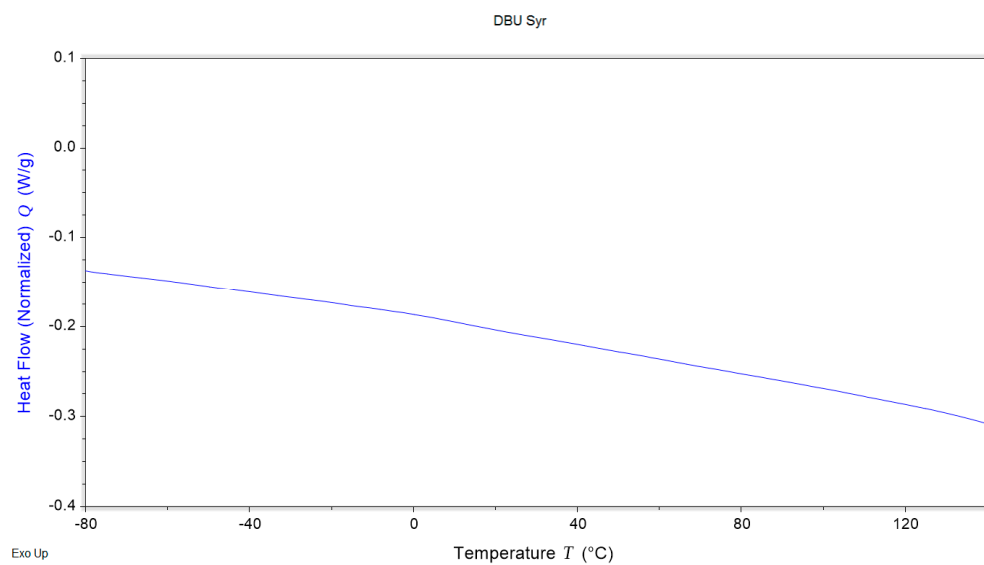**Figure S30** DSC curves of [DBU]Syr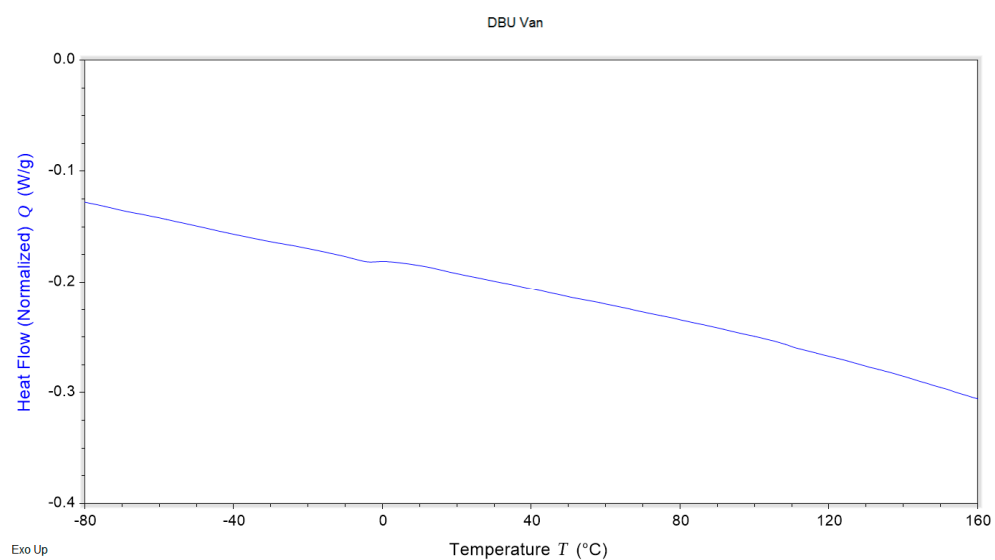**Figure S31** DSC curves of [DBU]Van
